Anesthesiology  
1996; 85:678-81  
© 1996 American Society of Anesthesiologists, Inc.  
Lippincott-Raven Publishers

## Use of Low Molecular Weight Heparin in Patients with Heparin-induced Thrombocytopenia Undergoing Carotid Endarterectomy

Alexandru Gottlieb, M.D.,\* Aldo H. Tabares, M.D.,† Pavel Levy, M.D.,† Juraj Sprung, M.D., Ph.D.,\*  
Kandice Kottke-Marchant, M.D., Ph.D.,‡ Peter K. Schoenwald, M.D.

CAROTID endarterectomy (CEA) is a common vascular surgical procedure for patients with severe carotid stenosis.<sup>1</sup> Heparin therapy, widely used during CEA, is not without risks and sometimes may be associated with a decrease in platelet count or thrombosis, a condition called heparin-induced thrombocytopenia (HIT).<sup>2</sup> This condition is believed to be immunologically mediated and involves the formation of heparin-dependent platelet antibodies (HDPAs)<sup>3</sup> that recognize a complex of heparin and platelet factor 4. The estimated prevalence of HDPAs in patients receiving heparin is 7.8%.<sup>4</sup>

In patients with HIT who are candidates for CEA, a substitute for unfractionated heparin (UFH) should be used. Low molecular weight heparins (LMWHs) have a favorably high anti-factor Xa-to-anti-factor IIa activity ratio, which implies an improved antithrombotic potential with fewer bleeding side effects. The antithrombotic intravenous dose of LMWH (enoxaparin)<sup>5</sup> during CEA has not been established. We report the intraoperative use (dose and monitoring) of enoxaparin (Lovenox, Rhone-Poulenc Rorer Pharmaceuticals, Collegeville, PA) in three patients with documented HIT and HDPAs who underwent four CEAs.

\* Staff Anesthesiologist, Department of General Anesthesiology.

† Fellow, Department of Vascular Medicine.

‡ Staff member, Department of Clinical Pathology.

Received from the Departments of General Anesthesiology, Vascular Medicine, and Clinical Pathology, The Cleveland Clinic Foundation, Cleveland, Ohio. Submitted for publication February 29, 1996. Accepted for publication May 25, 1996.

Address reprint requests to Dr. Gottlieb: Department of General Anesthesiology, E-31, The Cleveland Clinic Foundation, 9500 Euclid Avenue, Cleveland, Ohio 44195. Address electronic mail to: gottlieb@cesmtp.ccf.org.

Key words: Complications: heparin-dependent platelet antibody; heparin-induced thrombocytopenia. Drugs: low-molecular-weight heparin (enoxaparin); unfractionated heparin. Drug effect: anticoagulation. Surgery: carotid endarterectomy.

### Case Reports

Three patients who were 73, 76, and 78 yr old and had 80 to 99% stenosis of the internal carotid artery underwent elective CEA under general anesthesia. All had a history of severe coronary artery and peripheral vascular diseases and underwent multiple vascular reconstructions with repeated exposure to UFH, complicated by either thrombosis or thrombocytopenia. All patients had positive HDPAs to UFH as documented by the platelet aggregation method.<sup>6,7</sup> Results of the patients' preoperative coagulation profiles were within normal limits (table 1), and they had no history of bleeding tendencies immediately before these operations. Tests for HDPAs to both UFH and LMWH were repeated before each CEA. In all cases, the test results were negative for LMWH. In two patients, repeated tests for HDPAs to UFH became negative 4 (patient 1) and 12 months (patient 3) after the initial testing.

Enoxaparin, which was used as an anticoagulant in all cases, was given intravenously 5 min before carotid artery clamping. In one patient with symptomatic carotid disease (patient 3), a continuous intravenous infusion of 2 mg · kg<sup>-1</sup> · day<sup>-1</sup> enoxaparin was administered before operation. This treatment was continued until carotid artery cross-clamping, when an additional intravenous bolus of 45 mg enoxaparin was given.

The antithrombotic effect of enoxaparin was monitored with anti-factor-Xa activity assays (Dupont ACA, Wilmington, DE) before surgery, 5 min after injection of enoxaparin, after protamine sulfate administration (when used), and on the first postoperative day. At these times, we also obtained prothrombin time, activated partial thromboplastin time, a platelet count, fibrinogen concentration, and activated clotting time. Table 1 lists all antithrombotic therapy and coagulation parameters. The operative and postoperative courses were uneventful and the patients had no thrombocytopenia, thrombosis, or bleeding. No hematoma formation was observed, and the average amount of neck drainage in the four operations was 25 ml, which is comparable to other CEAs.

### Discussion

Thrombotic complications after heparin therapy may involve different systems and are associated with significant morbidity and death.<sup>8-10</sup> Unexplained recurrent thrombocytopenia, thrombotic events, or both, in patients receiving UFH should raise the suspicion for HIT, and testing for HDPAs is strongly indicated in these

Table 1. Coagulation Parameters and Enoxaparin Therapy in Three Patients with Heparin-induced thrombocytopenia during four Carotid Endarterectomies

| Operation # | Pt #1 Op. #1 | Pt #1 Op. #2 | Pt #2 Op. #3 | Pt #3 Op. #4 |
|-------------|--------------|--------------|--------------|--------------|
| 1           | 1            | 2            | 3            | 4            |
| 2           | 5            | 6            | 7            | 8            |
| 3           | 9            | 10           | 11           | 12           |
| 4           | 13           | 14           | 15           | 16           |

## CASE REPORTS

Table 1. Coagulation Parameters and Enoxaparin Therapy in Three Patients with Heparin-induced thrombocytopenia during four Carotid Endarterectomies

| Coagulation Test                       | Normal Range | Pt #1 Op. #1   |                                  |             |       | Pt #1 Op. #2   |                                  |             |       | Pt #2 Op. #3                                                      |                                              |                                                                  |        | Pt #3 Op. #4                                                  |       |  |  |
|----------------------------------------|--------------|----------------|----------------------------------|-------------|-------|----------------|----------------------------------|-------------|-------|-------------------------------------------------------------------|----------------------------------------------|------------------------------------------------------------------|--------|---------------------------------------------------------------|-------|--|--|
|                                        |              | Intraoperative |                                  |             |       | Intraoperative |                                  |             |       | Intra-op                                                          |                                              |                                                                  |        | Intra-op                                                      |       |  |  |
|                                        |              | Pre-op         | ENO 1.4<br>mg · kg <sup>-1</sup> | PS 50<br>mg | POD-1 | Pre-op         | ENO 1.4<br>mg · kg <sup>-1</sup> | PS 50<br>mg | POD-1 | Pre-op (Eno-Inf. 2<br>mg · kg <sup>-1</sup> · day <sup>-1</sup> ) | Intra-op (Eno-0.6<br>mg · kg <sup>-1</sup> ) | POD-1 (Eno Inf. 2<br>mg · kg <sup>-1</sup> · day <sup>-1</sup> ) | Pre-op | Intra-op<br>(Eno 0.8<br>mg <sup>-1</sup> · kg <sup>-1</sup> ) | POD-1 |  |  |
| Anti-Xa IU · ml <sup>-1</sup>          | —            | 0.14           | 2.4                              | 0.91        | —     | —              | 1.95                             | 0.45        | 0.04  | 0.85                                                              | 1.35                                         | 1.22                                                             | 0.02   | 1.11                                                          | 1.02  |  |  |
| PPT sec                                | 8.8–13.3     | 12.3           | —                                | 12.4        | 11.5  | 11.1           | 12.2                             | 11.7        | 10.7  | 10.4                                                              | 12.7                                         | 11.7                                                             | 11.3   | 11                                                            | 11.4  |  |  |
| INR                                    | 0.81–1.21    | 1.12           | —                                | 1.13        | 1.04  | 1              | 1.11                             | 1.15        | —     | 1.49                                                              | 1.15                                         | 1.06                                                             | 1.02   | 1                                                             | 1.04  |  |  |
| PPT sec                                | 21.5–32.5    | 28.2           | —                                | 33.3        | 26.9  | 20.5           | 24.1                             | 33.2        | 25.6  | —                                                                 | 43                                           | —                                                                | 28.4   | 23.9                                                          | 38.6  |  |  |
| PLT 10 <sup>3</sup> · mm <sup>-3</sup> | 150–400      | 225            | —                                | 178         | 231   | 231            | 196                              | 171         | 171   | 84                                                                | 85                                           | 137                                                              | 203    | 202                                                           | 200   |  |  |
| FIB mg · dl <sup>-1</sup>              | 200–400      | 426            | —                                | 380         | 439   | 281            | 275                              | 281         | 275   | —                                                                 | 327                                          | —                                                                | 348    | 340                                                           | 348   |  |  |
| ACT sec                                | 80–170       | 170            | 226                              | 134         | —     | 165            | 129                              | 159         | —     | —                                                                 | 136                                          | —                                                                | 142    | 204                                                           | —     |  |  |

ACT = activated clotting time, performed using a Hemochron coagulation analyzer; Anti-Xa = anti factor Xa activity performed by a chromogenic assay (Dupont ACA); Eno = enoxaparin; FIB = fibrinogen, performed by the Clauss technique on the MLA Electra 1600; INF = infusion; INR = international normalized ratio; PLT = platelets count; POD = postoperative-day; PS = protamine sulfate; Pt = patient; PT = prothrombin time; PTT = partial thromboplastin time.

PT, INR, and PTT were all performed using Innovin and Actin FSL on an MLA Electra 1600.

patients. All of our patients had histories suggestive of HIT and all had documented HDPA by the platelet aggregation method.<sup>6,7</sup>

Heparin-dependent platelet antibodies can be detected by several methods. A routinely used platelet aggregation method appears to be highly specific but has low sensitivity.<sup>6,7</sup> The <sup>14</sup>C-labeled serotonin-release assay, presumably the standard for HDPA testing, has high specificity and sensitivity<sup>4</sup> but involves the use of radioactive material and therefore is unavailable in many clinical laboratories. A recently developed platelet factor 4/heparin enzyme-linked immunosorbent assay produces results that correlate closely with those of the serotonin-release assay.<sup>11</sup> Two of our patients (patients 1 and 3) had negative antibody test before CEA after previously being diagnosed with positive HDPA. It was suggested that after a period of 3 to 6 months HDPA may either disappear<sup>12</sup> or become undetectable using <sup>14</sup>C-serotonin release. At the same time, platelet aggregation tests are less sensitive for detecting HDPA during even acute events<sup>6,7</sup> and may fail to detect low antibody titer present several months after the initial diagnosis. In this case, this "test insensitivity" may create a risk for causing HIT after reexposure to UFH. Until all these issues are resolved, we believe that patients with clear histories of HIT and documentation of HDPA in the past should be considered positive for heparin antibodies.

Patients with documented HIT and HDPA who undergo revascularization procedures require a substitute for regular heparin. Low molecular weight heparins have a higher antithrombotic-to-anticoagulation therapeutic ratio,<sup>3,5</sup> a lower rate of bleeding complications,<sup>13,14</sup> and probably a lower risk for HIT.<sup>4</sup> Recently several authors reported the use of LMWH in patients with HIT undergoing cardiopulmonary bypass<sup>15</sup> and in those having lower extremity arterial reconstruction.<sup>16</sup>

Although LMWHs cause only an attenuated inhibition of factor IIa (thrombin) by anti-thrombin III, their ability to inhibit factor Xa is maintained.<sup>13</sup> The standard coagulation tests, such as activated partial thromboplastin time and activated clotting time, are relatively insensitive and therefore inadequate for monitoring the therapeutic effect of enoxaparin. To monitor the effect of LMWHs, some authors suggest measuring anti-factor Xa activity in plasma.<sup>17</sup>

The antithrombotic intravenous dose of enoxaparin has not been established and is mainly a matter of individual experience. Anti-Xa activities during use of 4.5 mg/kg enoxaparin for cardiopulmonary bypass





## CASE REPORTS

11. Greinache A, Amiral V, Dunmel V, Vissac AM, Kiefel V, Mueller-Eckhardt C: Laboratory diagnosis of heparin-associated thrombocytopenia and comparison of platelet aggregation test, heparin-induced activation test, and platelet factor 4/heparin enzyme-linked immunosorbent assay. *Transfusion* 1994; 34:381-5
12. Nelson JC, Lerner RG, Goldstein R, Cagin NA: Heparin-induced thrombocytopenia. *Arch Intern Med* 1978; 138:548-52
13. Barrowcliffe TW: Low molecular weight heparin(s): Annotation. *Br J Haematol* 1995; 90:1-7
14. Kakkar VV, Cohen AT, Edmons RA, Phillips MJ, Das SK, Maher KT, Sanderson RM, Ward VP, Kakkar S: Low molecular weight versus standard heparin for prevention of venous thromboembolism after major abdominal surgery. *Lancet* 1993; 341:259-65
15. Robitaille D, LeClerc JR, Laberge R, Sahab P, Atkinson S, Cartier R: Cardiopulmonary bypass with low-molecular weight heparin fraction (enoxaparin) in a patient with a history of heparin-associated thrombocytopenia. *J Thorac Cardiovasc Surg* 1992; 103:597-9
16. Samama CM, Barre E, Combe S, Dreux S, Kieffer E, Viars P: A pilot study on the use of a low molecular weight heparin (enoxaparin) in arterial reconstructive surgery. *Semin Thromb Hemost* 1991; 17:367-70
17. Samama MM, Combe S, Horellou MH, Augras D, Truc JB, Conard J: Anti Xa activity and prothrombinase inhibition in patients treated with two different doses of enoxaparin in gynecological surgery. *Thromb Res* 1991; 14:29-37
18. Massonnet-Castel S, Pellissier E, Bara L, Terrier E, Abry B, Guibourt P, Swanson J, Jaulmes B, Carpentier A, Samama M: Partial reversal of low molecular weight heparin (PK10169) anti Xa activity by protamine sulfate: In vitro and in vivo study during cardiac surgery with extra corporeal circulation. *Haemostasis* 1986; 16:139-46
19. Chong BH: Heparin-induced thrombocytopenia. *Aust N Z J Med* 1992; 22:145-52
20. Ramakrishna R, Manoharan A, Kwan JL, Kyle PW: Heparin-induced thrombocytopenia: Cross-reactivity between standard heparin, low molecular weight heparin, dalteparin (Fragmin), and heparinoid (Orgaran). *Br J Haematol* 1995; 91:736-8
21. Kikta MJ, Keller MP, Humphrey PW, Silver D: Can low molecular weight heparins and heparinoids be safely given to patients with heparin-induced thrombocytopenia syndrome? *Surgery* 1993; 114:704-10
22. Vun MC, Evans S, Chong BH: Cross-reactivity study of low molecular weight heparin and heparinoid in heparin-induced thrombocytopenia. *Thromb Res* 1996; 81:525-32
